# Supplementary material for: Small RNA-mediated regulation of DNA dosage in the ciliate Oxytricha
Source: PubMed Central journal article supplement — RNA. 2018 Jan;24(1):18–29. doi: 10.1261/rna.061333.117 (PMC5733567; doi:10.1261/rna.061333.117), 2018-01

**A**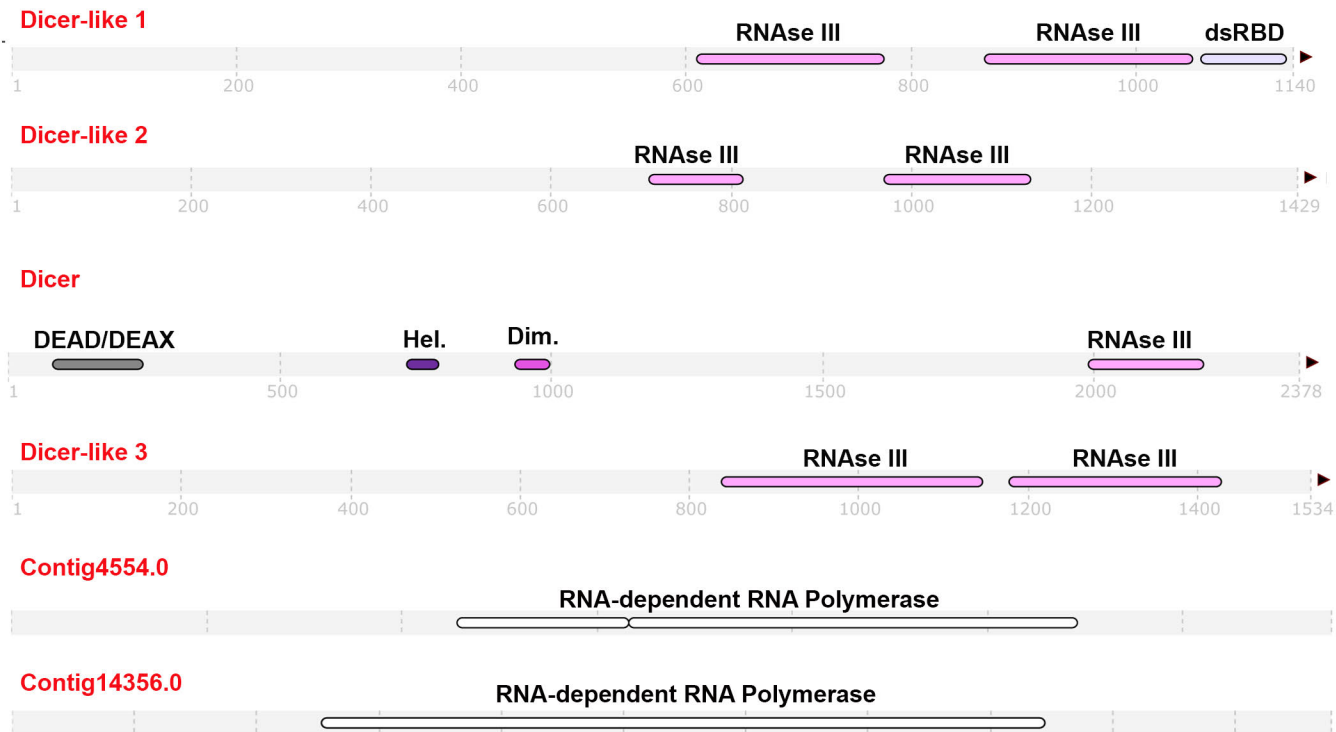**B*****Dicer* gene expression**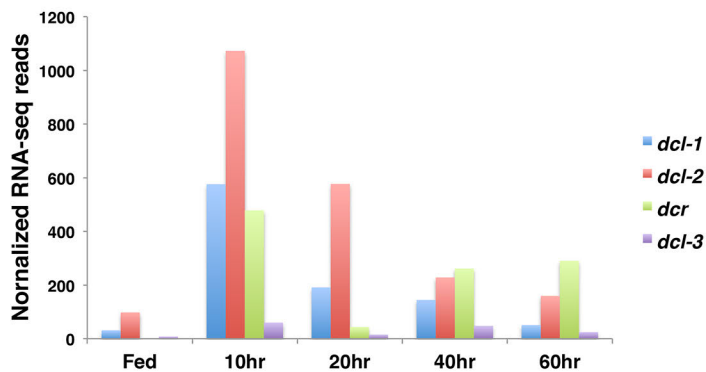**C*****rdrp* gene expression**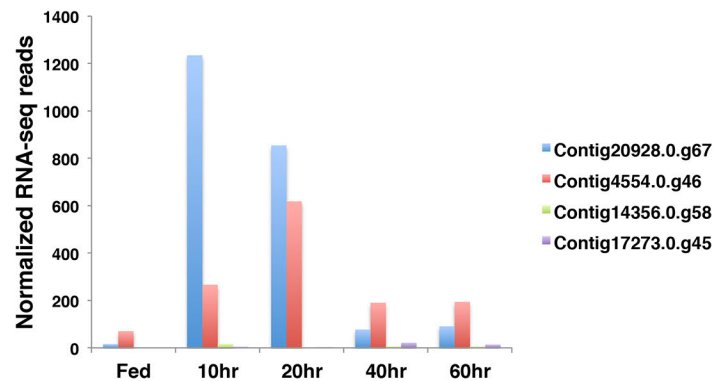

Figure S2

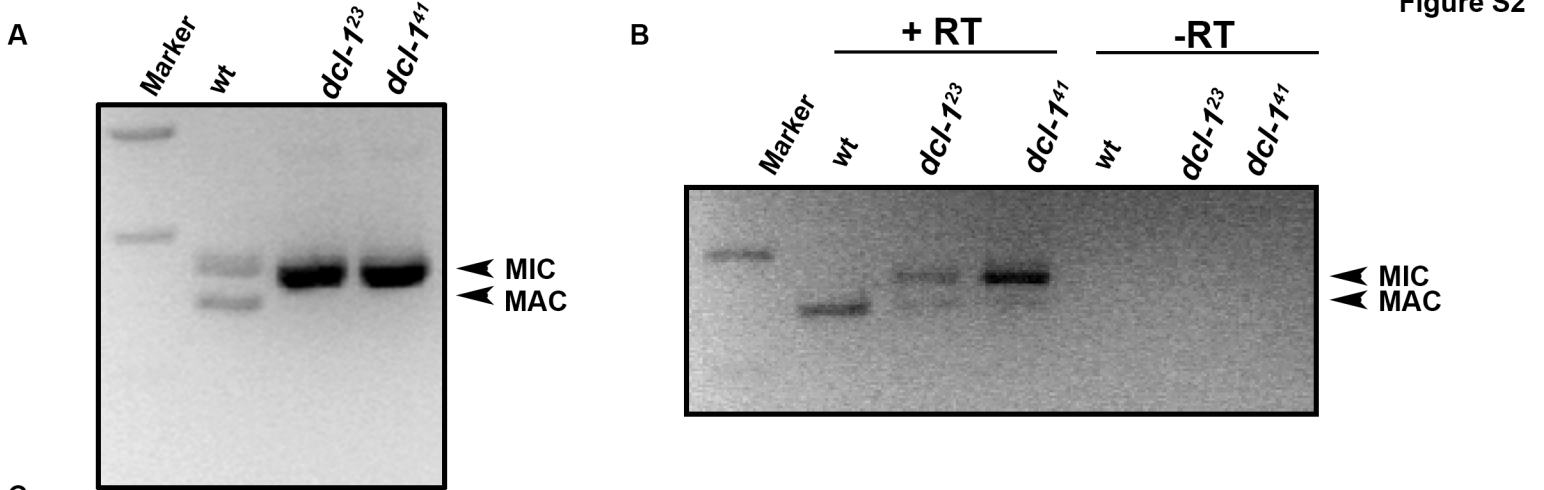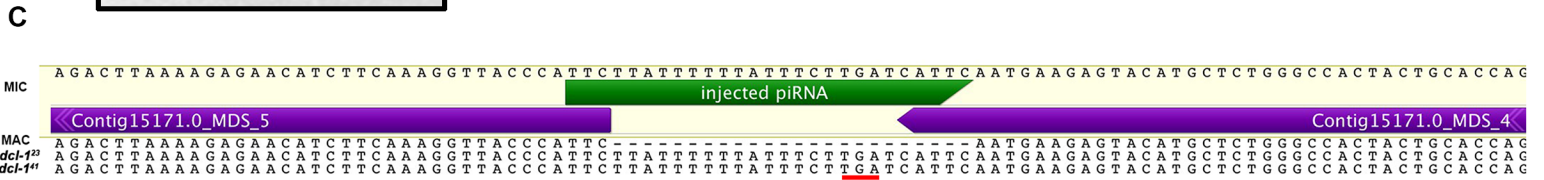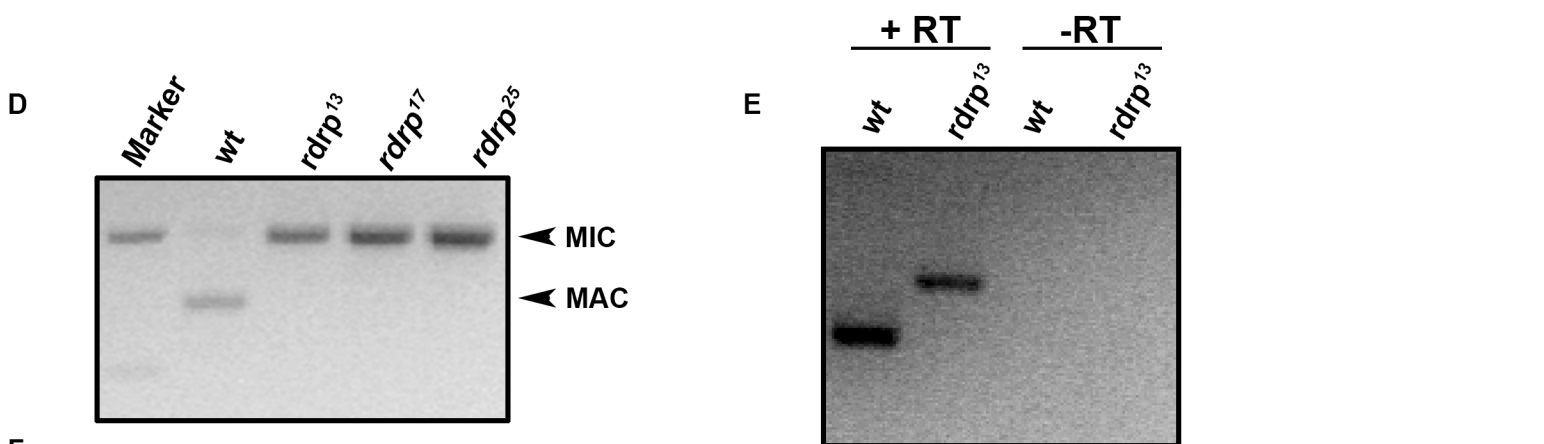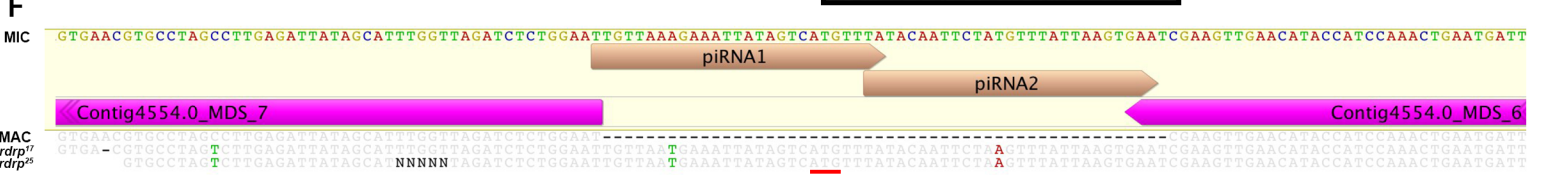

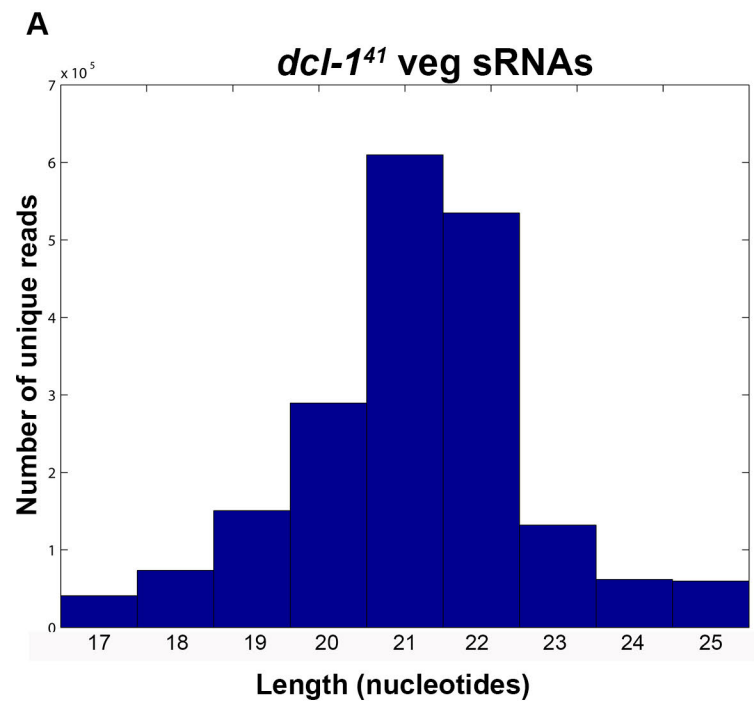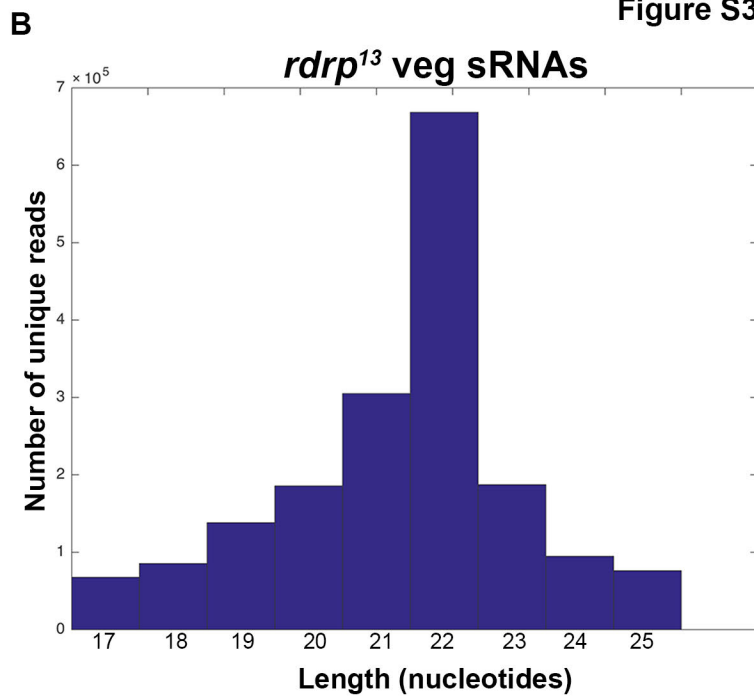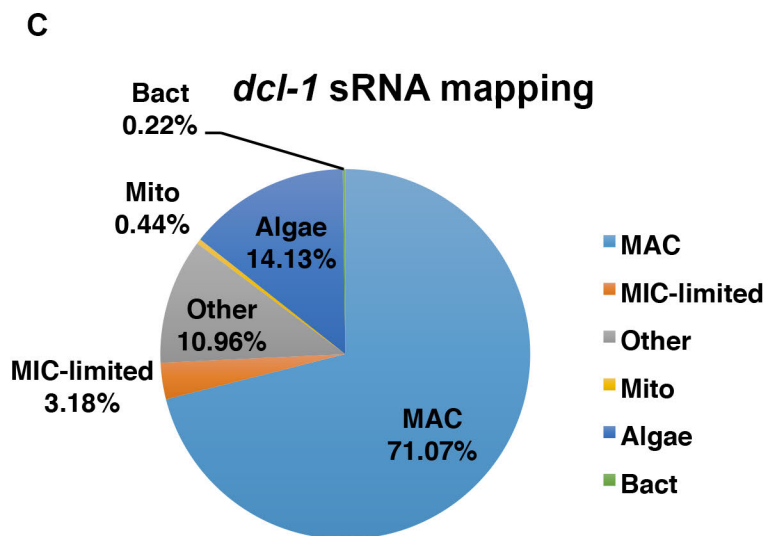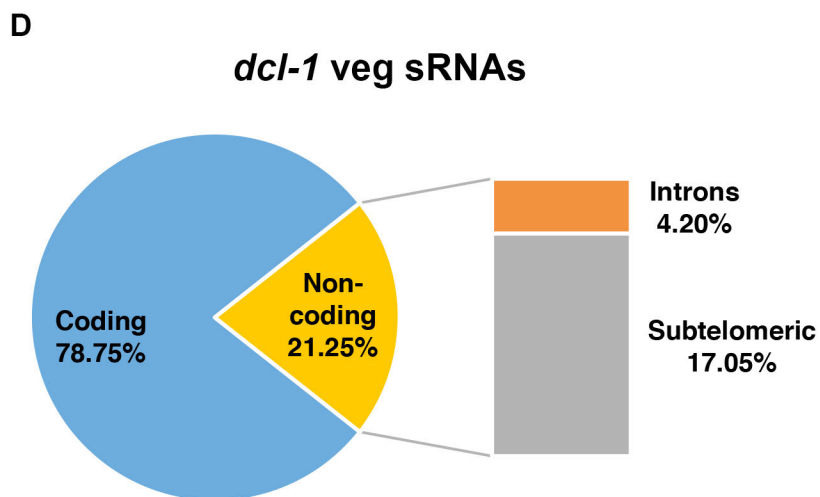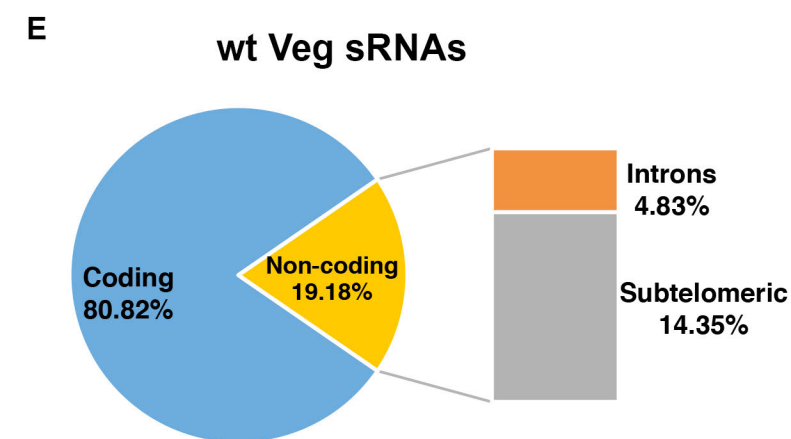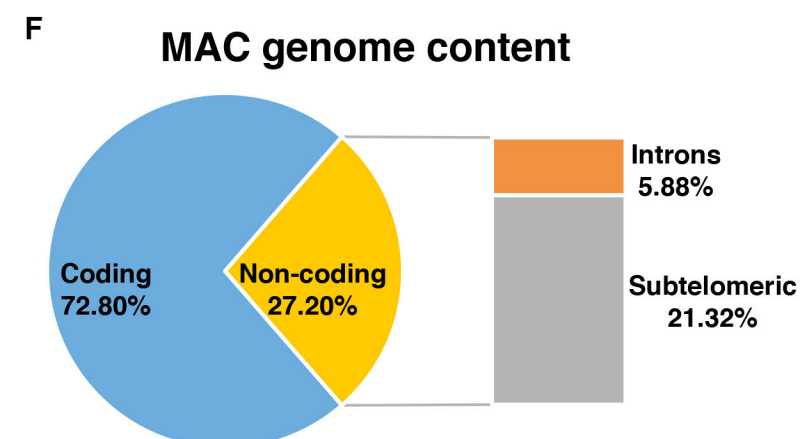

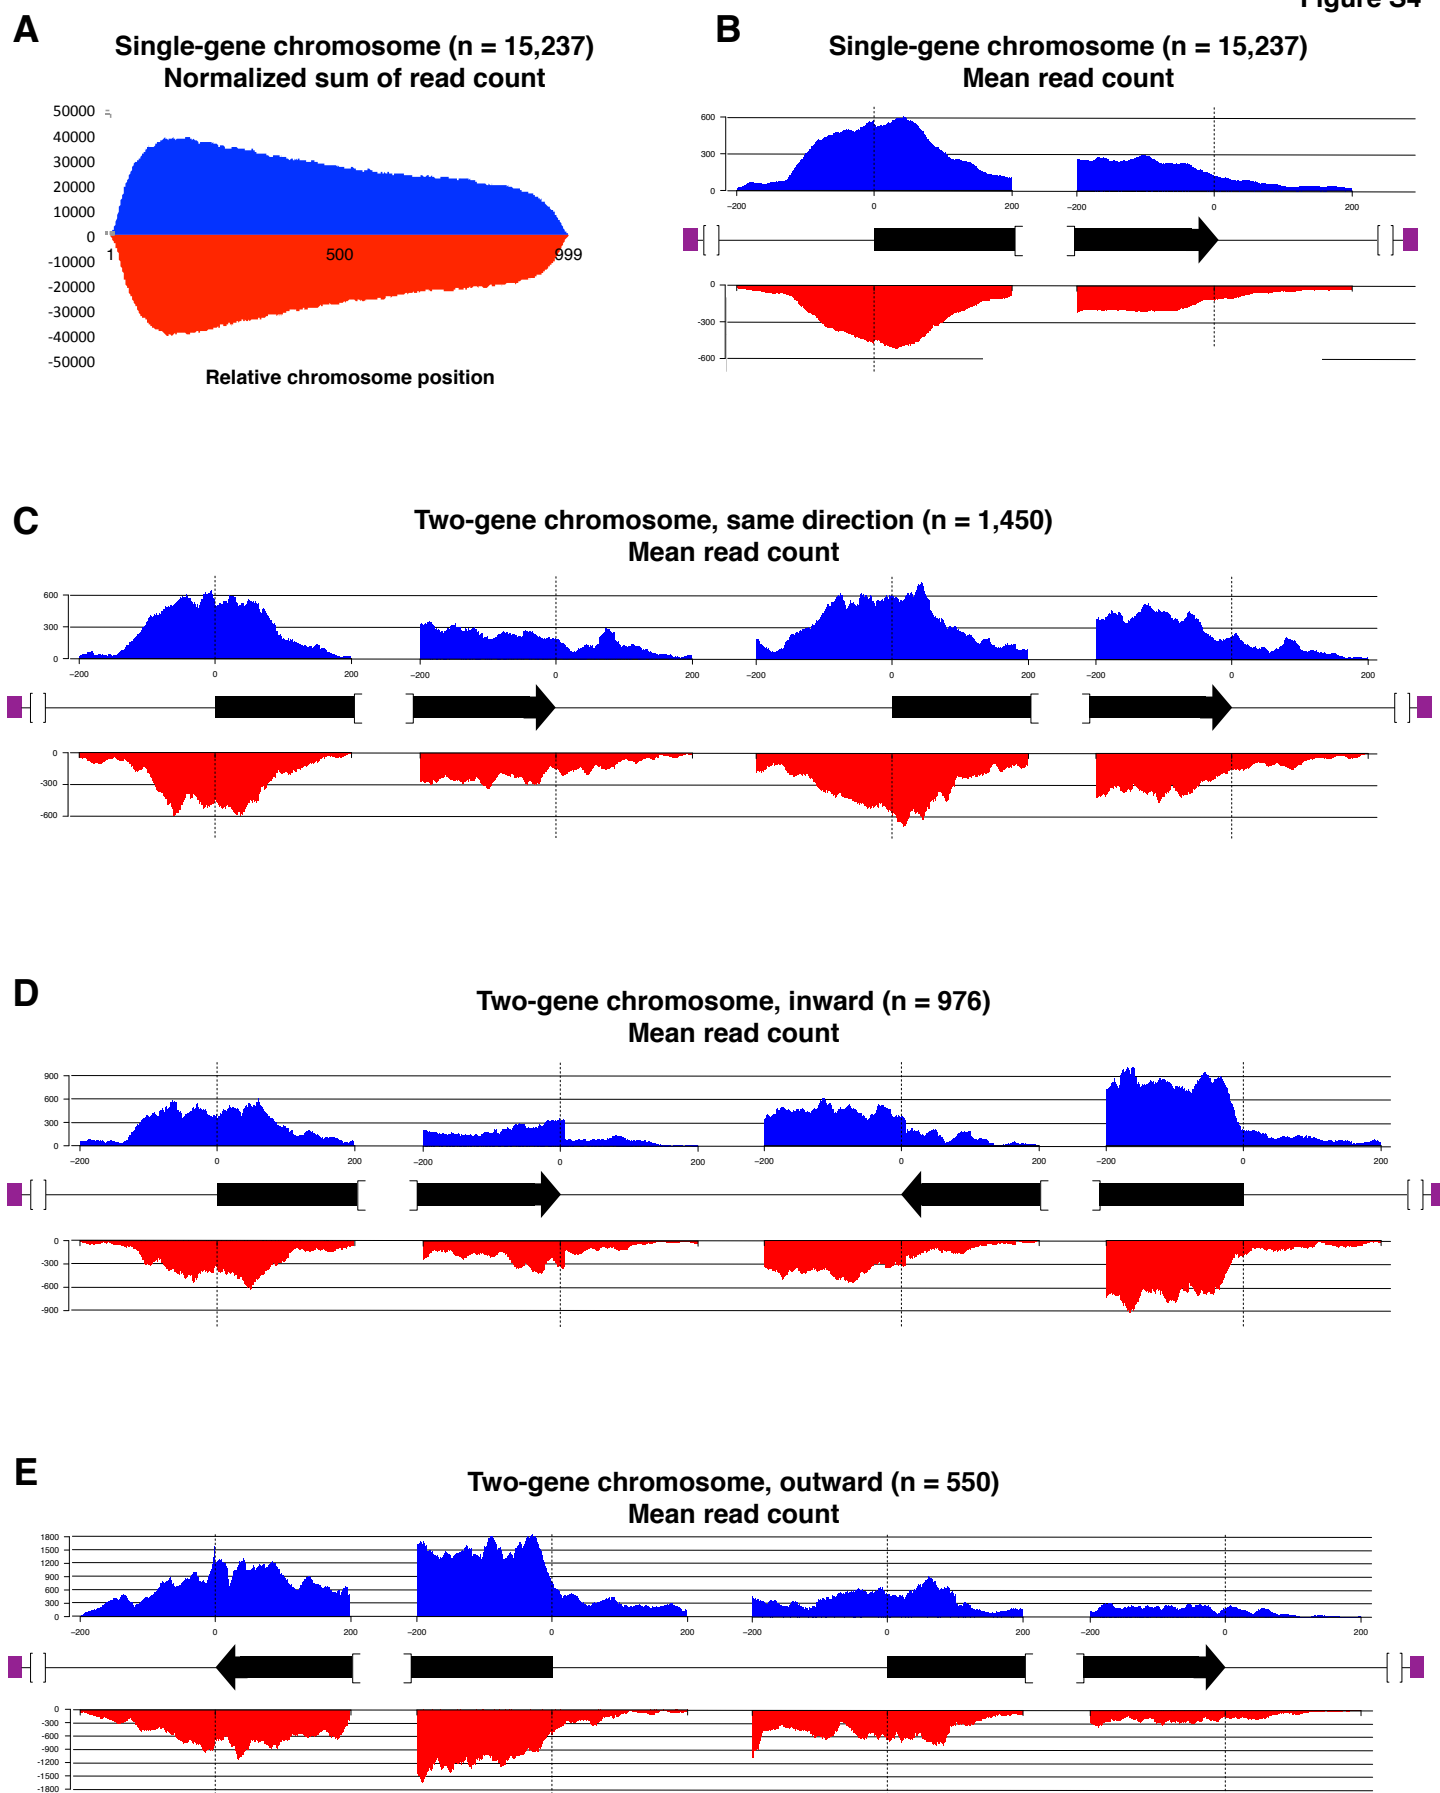



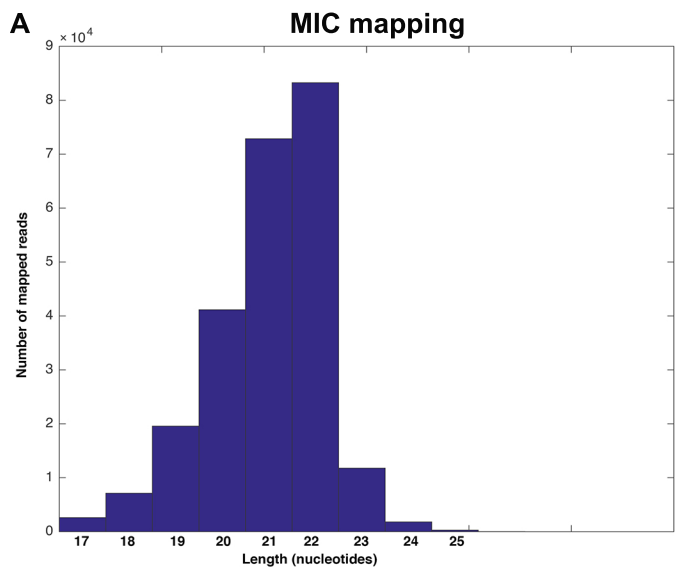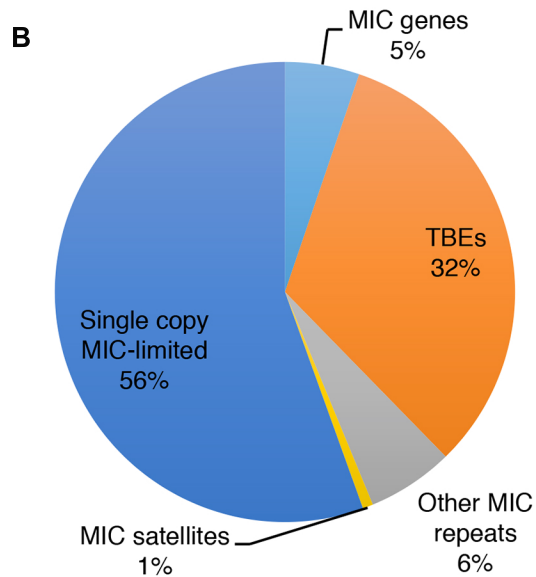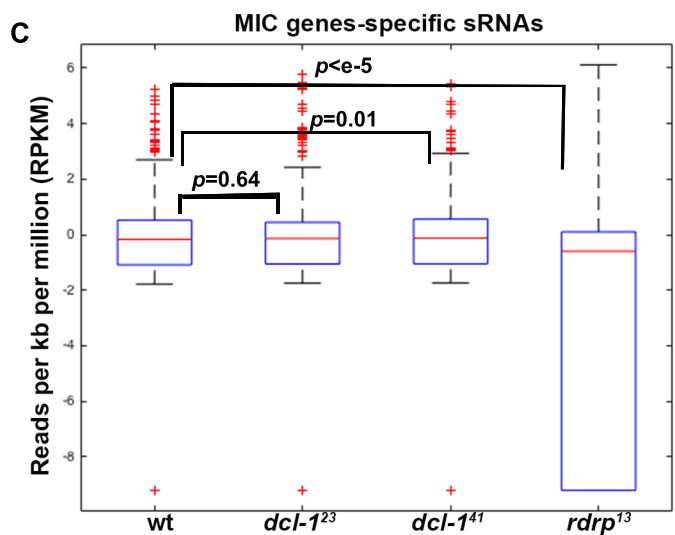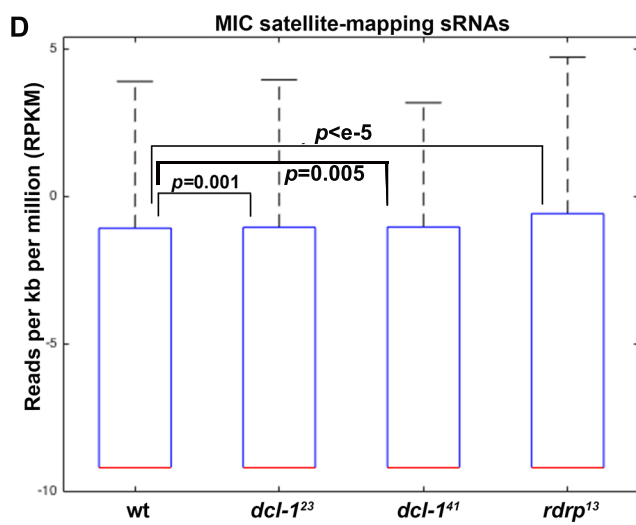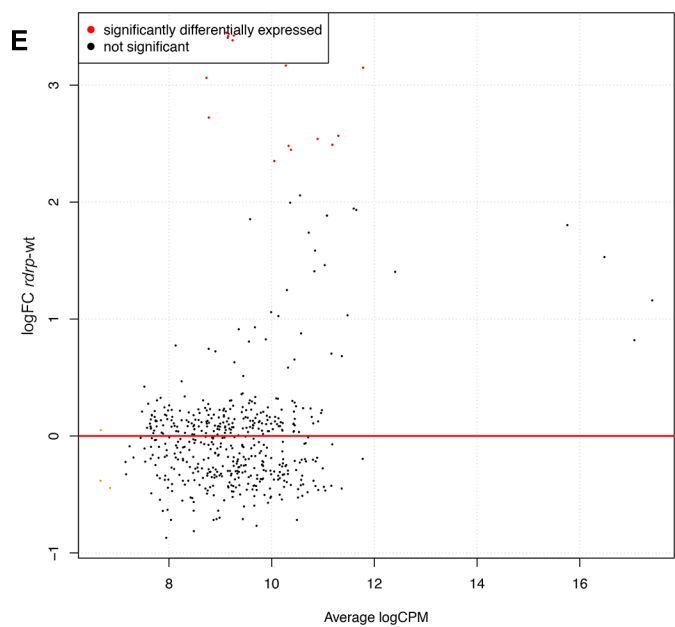

Figure S6

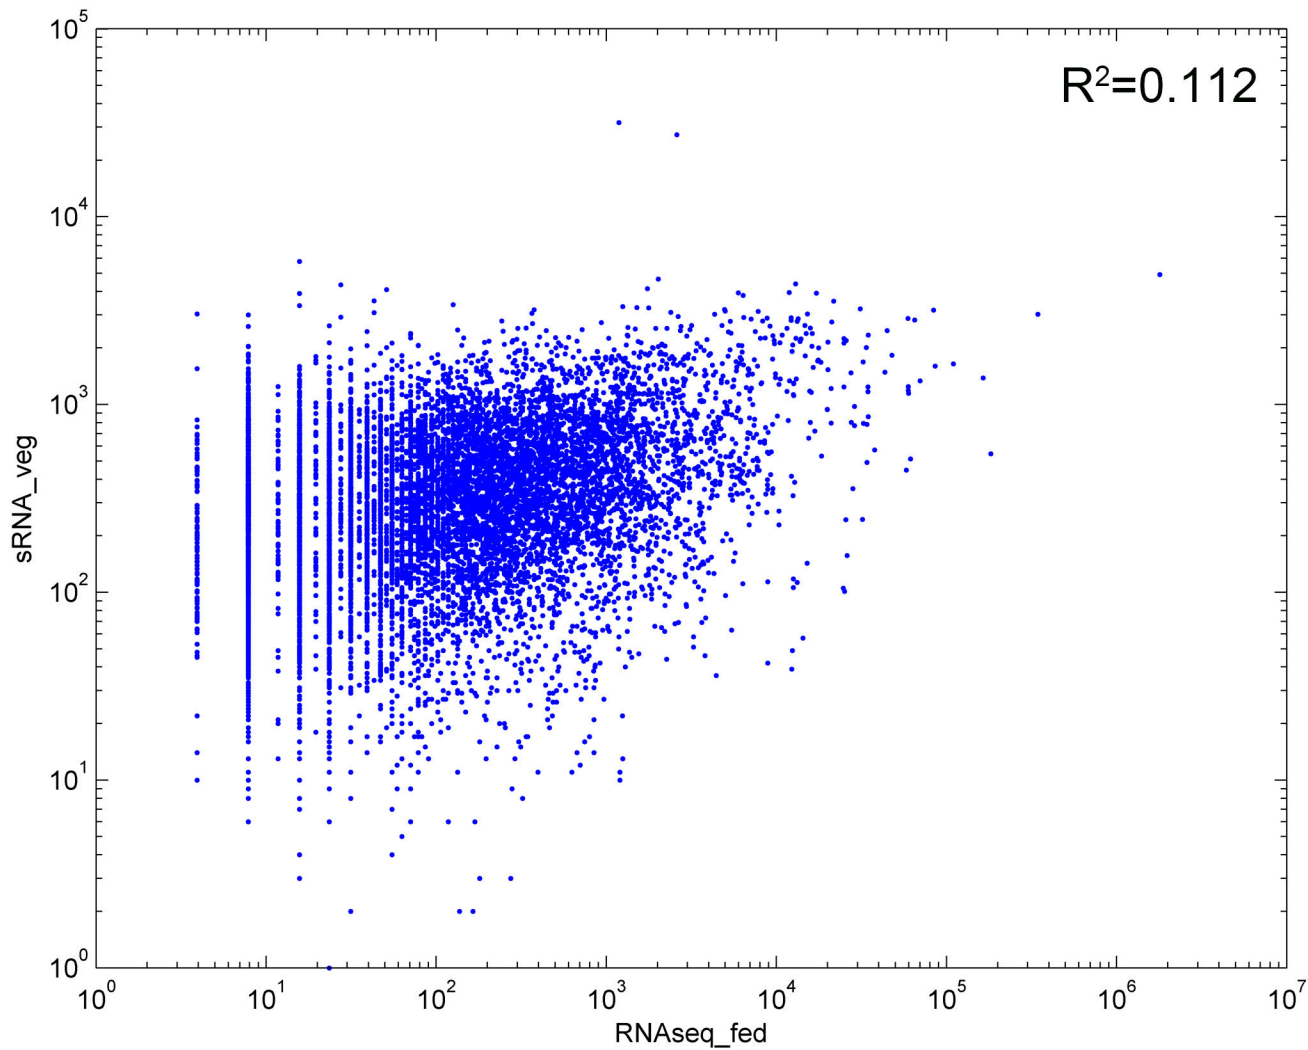

Figure S7

**A**

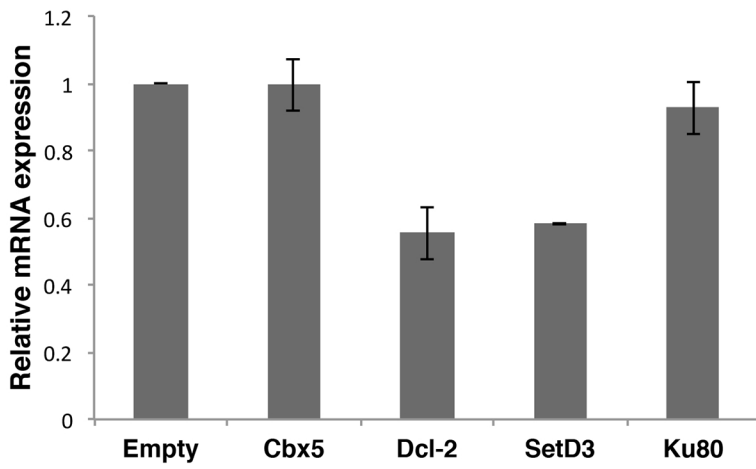

**B**

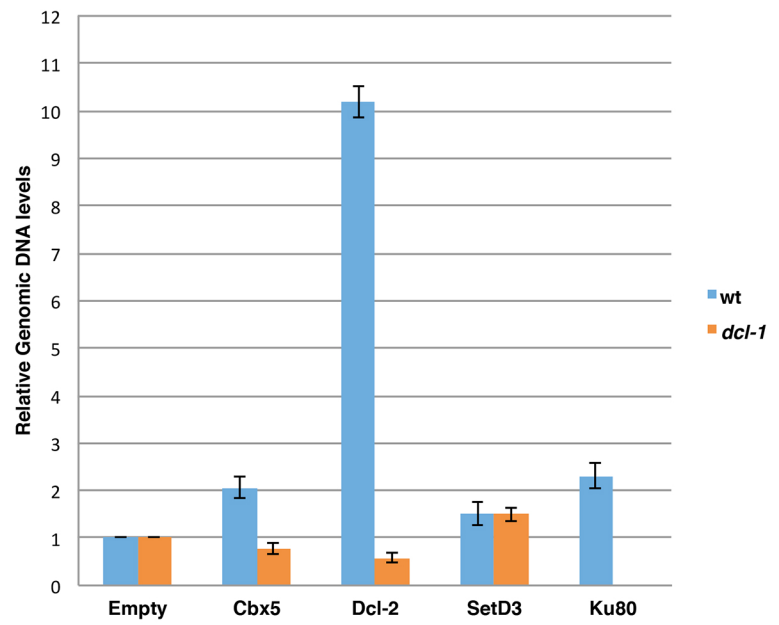

**C**

Mitochondrial rDNA copy number

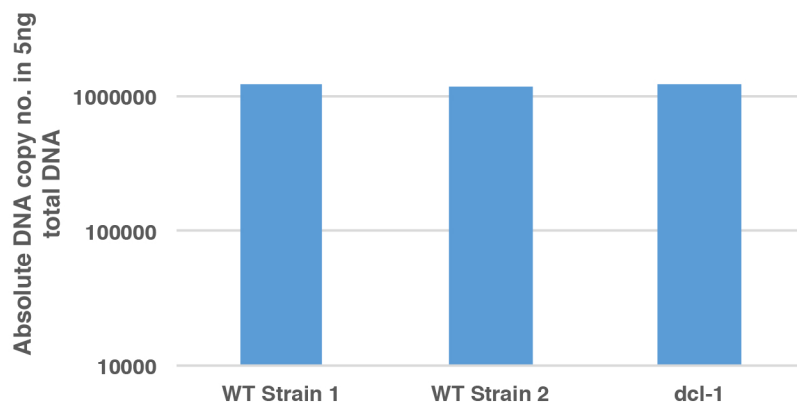

**D**

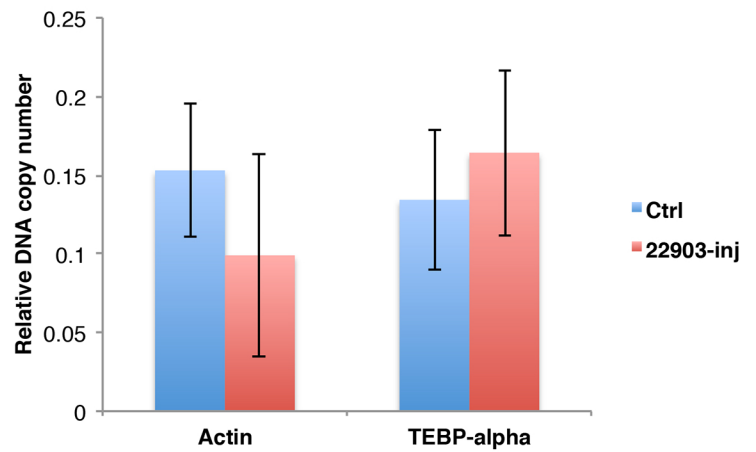

**E**

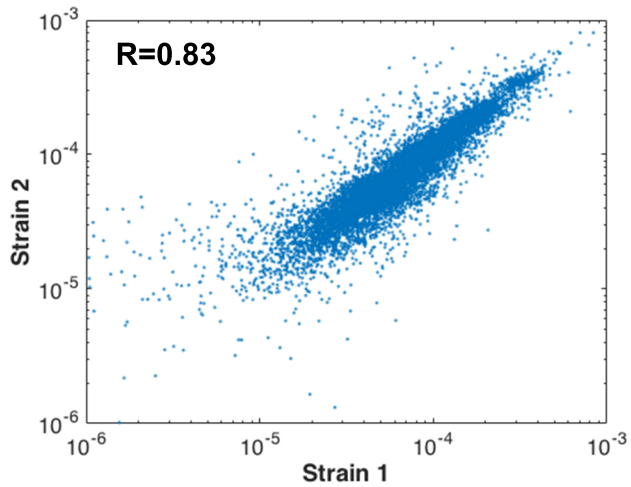

Figure S8

A

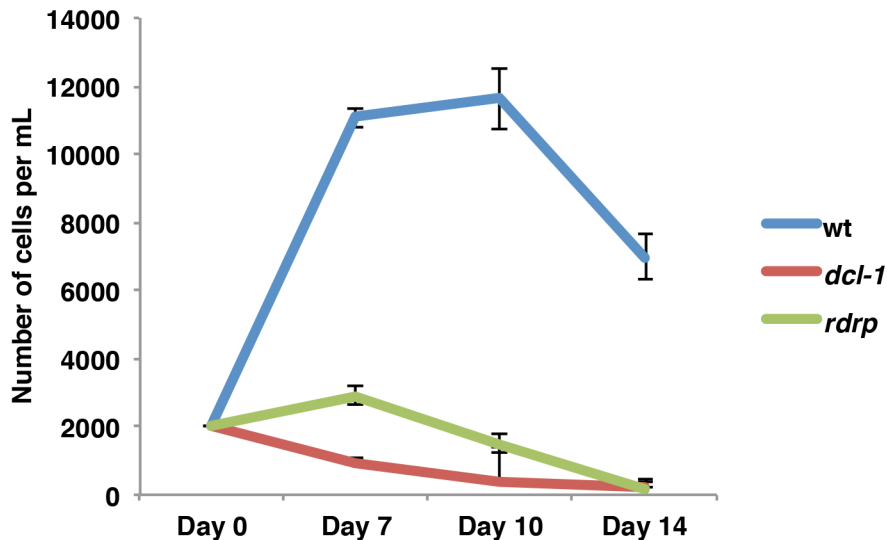

B

| Cells        | Growth Rate (in 24hrs) |
|--------------|------------------------|
| wt           | 2.8                    |
| <i>dcl-1</i> | 1.5                    |
| <i>rdrp</i>  | 2.3                    |

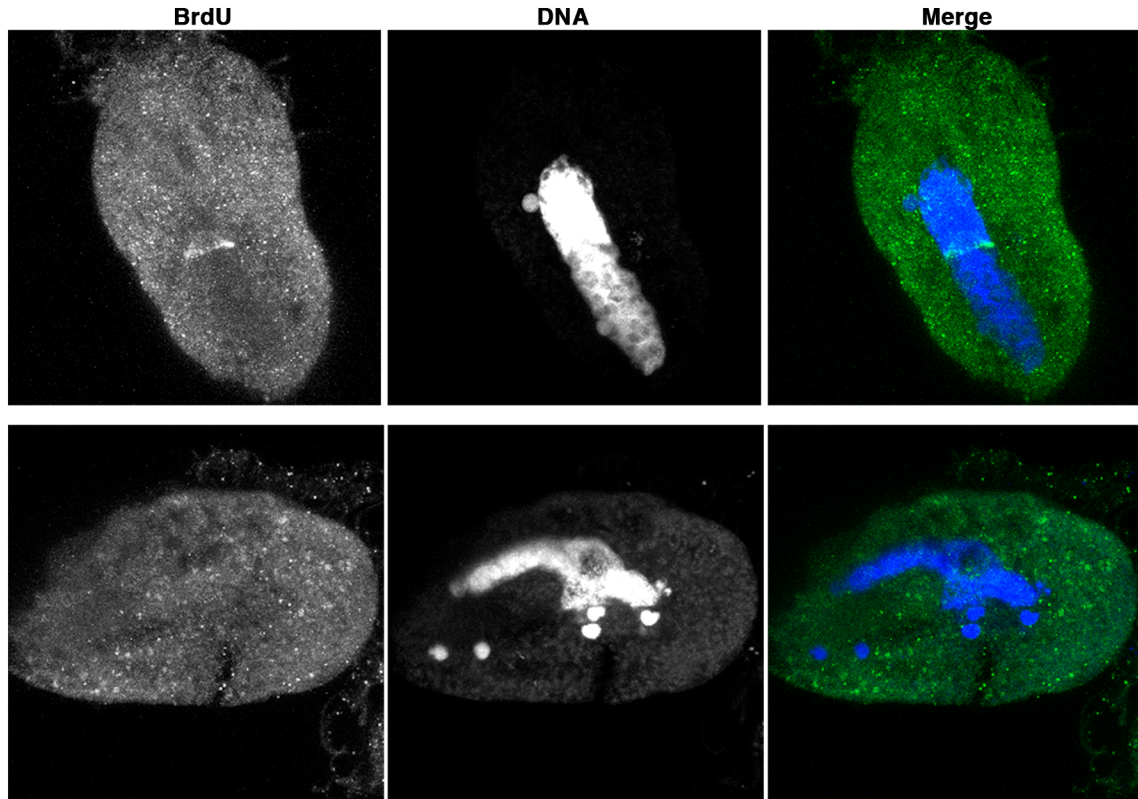

**Figure S9**

A

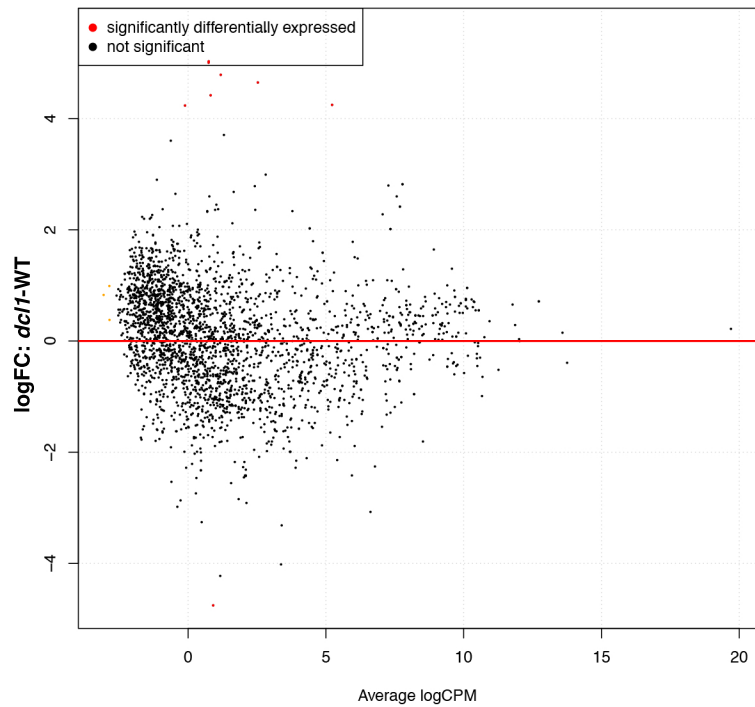

B

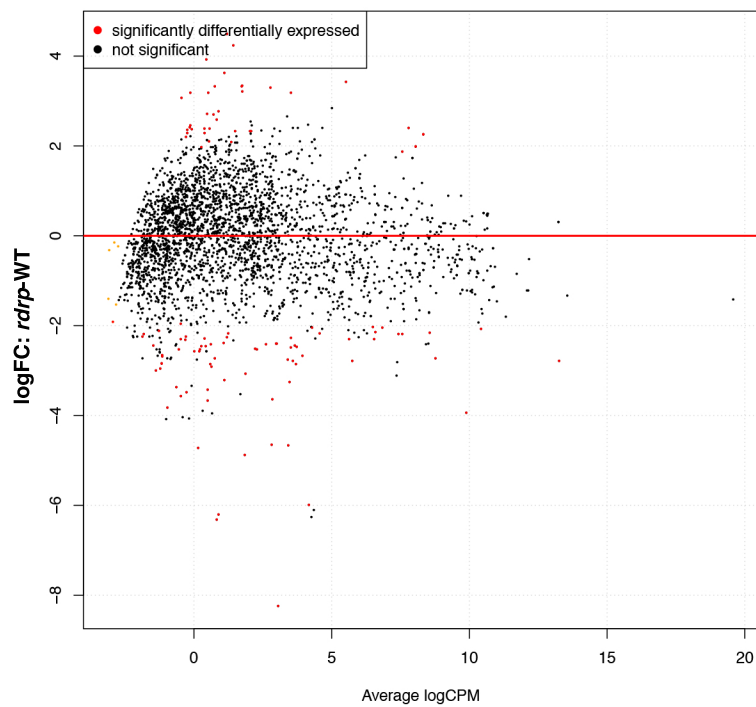

Supplement: supp_061333.117_Supplemental_Figures_S1-S10.pdf [file supp_061333.117_Supplemental_Figures_S1-S10.pdf]
